# Supplementary material
Source: MDPI journal article supplement (https://www.mdpi.com/2073-4441/16/1/11)
Supplement: s1 [file s1 › water-2761014-supplementary.pdf]

**Supplemental Information for “Distribution and Fate of Polyethylene Microplastics Released by a Portable Toilet Manufacturer into a Freshwater Wetland and Lake”**

**Julie R. Peller <sup>1,\*</sup>, Gavin Tabor <sup>1</sup>, Christina Davis <sup>1</sup>, Chris Iceman <sup>1</sup>, Ozioma Nwachukwu <sup>2</sup>, Kyle Doudrick <sup>2</sup>, Antigone Wilson <sup>1</sup>, Alyssa Suprenant <sup>1</sup>, David Dabertin <sup>3</sup> and Jon-Paul McCool <sup>4</sup>**

<sup>1</sup> Department of Chemistry, Valparaiso University, 1710 Chapel Drive, Valparaiso, IN 46383, USA; gavin.tabor@valpo.edu (G.T.); christina.davis@valpo.edu (C.D.); chris.iceman@valpo.edu (C.I.); antigone.wilson@valpo.edu (A.W.); alyssa.suprenant@valpo.edu (A.S.)

<sup>2</sup> Department of Civil and Environmental Engineering and Earth Sciences, University of Notre Dame, Notre Dame, IN 46556, USA; onwachuk@nd.edu (O.N.); kdoudrick@nd.edu (K.D.)

<sup>3</sup> Dabertin Law Offices, 5246 Hohman Avenue Suite 302, Hammond, IN 46320, USA; dabertin@netnitco.net

<sup>4</sup> Department of Geography and Meteorology, Valparaiso University, 1809 Chapel Drive, Valparaiso, IN 46383, USA; jonpaul.mccool@valpo.edu

\* Correspondence: julie.peller@valpo.edu

**Table S1.** Mass of core sediment samples and microplastic quantities found for sediment samples.

| Core #1 – Location 1 |                    |              |                      |                                   |                |
|----------------------|--------------------|--------------|----------------------|-----------------------------------|----------------|
| Depth (cm)           | Mass Processed (g) | Mass MP (mg) | Number of Roto/100mL | Number of Large Plastic Particles | Total MP Count |
| 0-5                  | 18.8               | 202.7        | ~7620                | 8                                 | 7,628          |
| 5-10                 | 19.1               | 170.1        | ~33                  | 0                                 | 33             |
| 10-20                | 30                 | 1.1          | ~200                 | 1                                 | 201            |
| 20-30                | 30                 | 5            | 250                  | 0                                 | 250            |
| Core #2 – Location 2 |                    |              |                      |                                   |                |
| Depth (cm)           | Mass Processed (g) | Mass MP (mg) | Number of Roto/100mL | Number of Large Plastic Particles | Total MP Count |
| 0-5                  | 9.7                | 182.2        | 1840                 | 37                                | 1877           |
| 5-10                 | 30.0               | 11.0         | 492                  | 0                                 | 492            |
| 10-15                | 30.0               | 17.0         | 480                  | 0                                 | 480            |
| 15-20                | 30.0               | 0.0          | 15                   | 0                                 | 15             |
| 20-25                | 22.2               | 0.0          | 6                    | 0                                 | 6              |
| Core #3 – Location 3 |                    |              |                      |                                   |                |
| Depth (cm)           | Mass Processed (g) | Mass MP (mg) | Number of Roto/100mL | Number of Large Plastic Particles | Total MP Count |
| 0-5                  | 30                 | 97.1         | 5660                 | 0                                 | 5660           |
| 5-10                 | 30                 | 0.0          | 0                    | 0                                 | 0              |
| 10-20                | 30                 | 0.0          | 4                    | 0                                 | 4              |
| 20-30                | 30                 | 0.0          | 3                    | 0                                 | 3              |
| Core #4 – Location 4 |                    |              |                      |                                   |                |
| Depth (cm)           | Mass Processed (g) | Mass MP (mg) | Number of Roto/100mL | Number of Large Plastic Particles | Total MP Count |
| 0-5                  | 3.53               | 142.9        | ~2,180               | 34                                | ~2214          |
| 5-10                 | 22.1               | 0.0          | 80                   | 0                                 | 80             |
| 10-20                | 30                 | 0.0          | 0                    | 0                                 | 0              |
| 20-30                | 30                 | 0.0          | 0                    | 0                                 | 0              |
| Core #5 – Location 5 |                    |              |                      |                                   |                |
| Depth (cm)           | Mass Processed (g) | Mass MP (mg) | Number of Roto/100mL | Number of Large Plastic Particles | Total MP Count |
| 0-5                  | 17.3               | 0            | 48                   | 0                                 | 48             |
| 5-10                 | 17.2               | 0            | 3                    | 0                                 | 3              |
| 10-15                | 20.9               | 0            | 2                    | 0                                 | 2              |
| 15-20                | 21.8               | 0            | 4                    | 0                                 | 4              |

**Table S2. Masses and numbers of microplastics (MP) isolated from 100 mL water samples collected from the George Lake area in April and October 2022 and May 2023. Locations 1 and 2 are the drainage outfall locations, 3 represents the open lake water and locations 4 and 5 are the marsh waters.**

| Sample location ID (Figure 1) | Mass, MP (g) (April 2022) | MP particles (April 2022) | Mass, MP (g) (October 2022) | MP particles (October 2022) | Mass, MP (g) (May 2023) | MP particles (May 2023) |
|-------------------------------|---------------------------|---------------------------|-----------------------------|-----------------------------|-------------------------|-------------------------|
| 1                             | 15.530                    | 123,680                   | 0.0513                      | 1643                        | 0.431                   | 18,594                  |
| 2                             | 13.459                    | 411,440                   | NA                          | NA                          | 0.230                   | 3,331                   |
| 3                             | 0.745*                    | 885*                      | NA                          | NA                          | 0.106                   | 726                     |
| 4                             | 1.288                     | 29,040                    | 0.0116*                     | 4973*                       | 0.153                   | 25,703                  |
| 5                             | 0.624                     | 8560                      | 0.341*                      | 11,674*                     | 0.367*                  | 3232*                   |

\*average of two or three samples; NA=not available

**Table S3. Compounds tentatively identified from marsh sediment samples**

|                  |                                               |
|------------------|-----------------------------------------------|
| Extraction/GC-MS | 9-dodecyltetrahydroanthracene                 |
| Extraction/GC-MS | 2,5-dimethyl-phenanthrene                     |
| Extraction/GC-MS | 9-dodecyltetrahydrophenanthrene               |
| Extraction/GC-MS | 7-isopropyl-1,4a-dimethyldecahydronaphthalene |
| Extraction/GC-MS | BTEX compounds                                |
| SPME/GC-MS       | 3,5-dimethyl-1-hexene                         |
| SPME/GC-MS       | 2-methylbutane                                |
| SPME/GC-MS       | 3-methyl-3-pentanol                           |
| SPME/GC-MS       | 2-propenyloxybenzene                          |

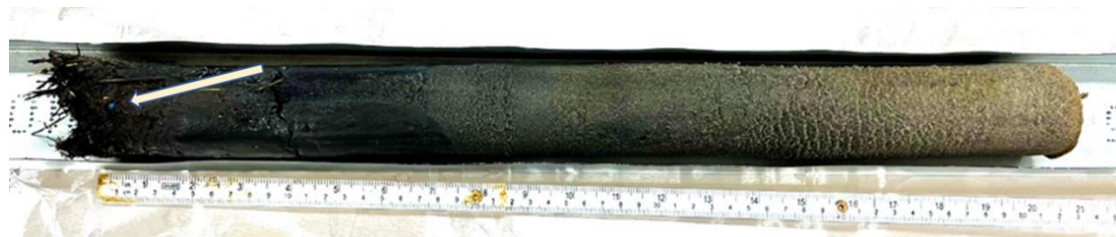

**Figure S1.** Core 5 sediment core, 52 cm depth. The organic sediment surface on the left contains visible (blue) microplastics. The sandy sediment at lower depths is on the right.

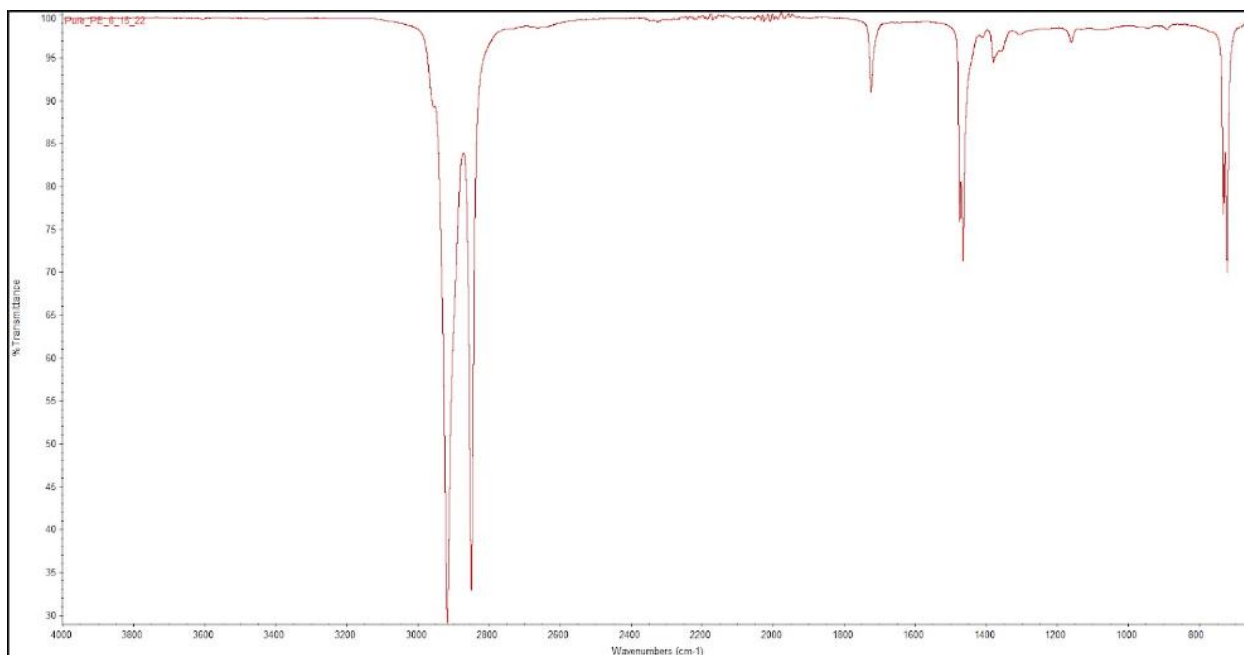

**Figure S2.** IR spectrum of clean polyethylene recovered from Poly John sample.

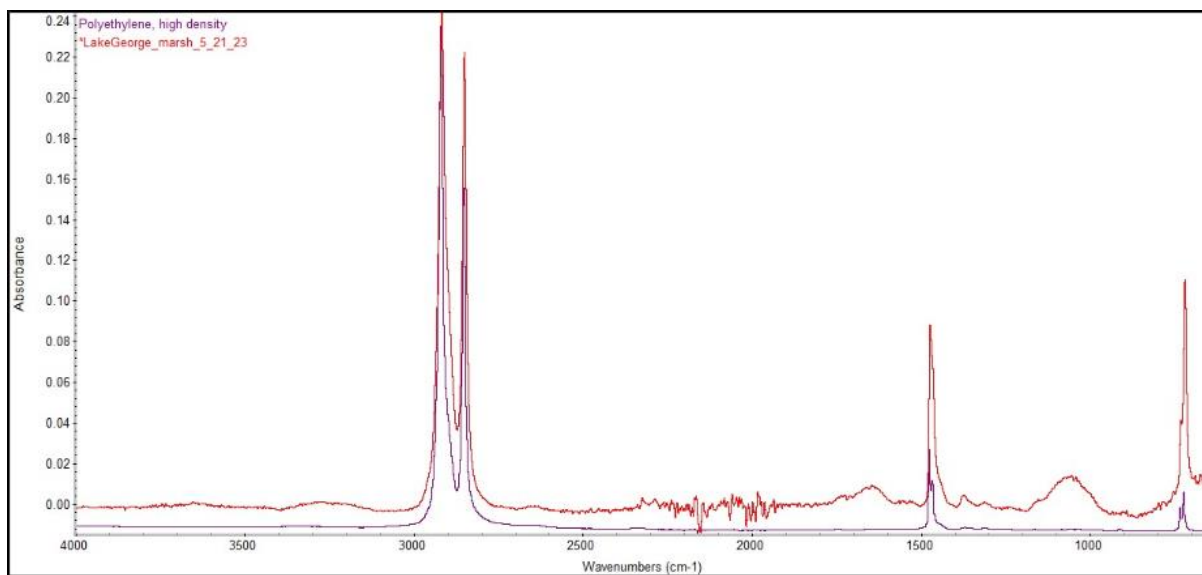

**Figure S3.** IR spectrum of rotopowder recovered from Poly John sample and library high-density polyethylene spectrum.

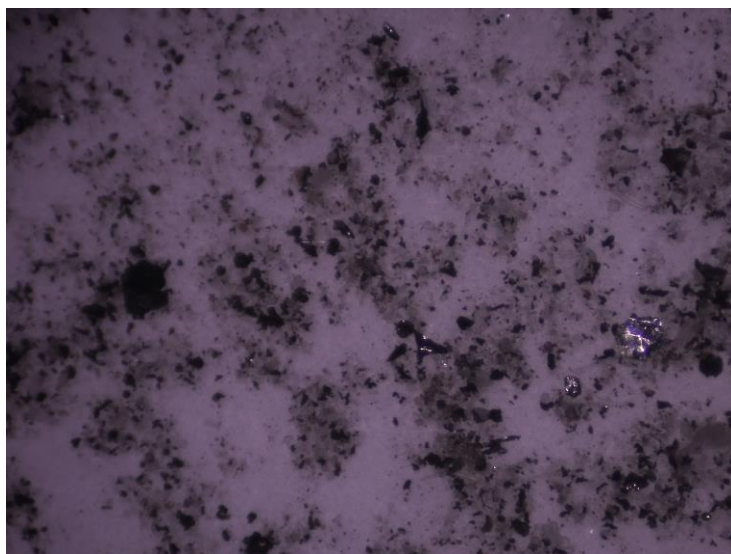

**Figure S4.** Stereomicroscope image of an oxidized sample from passive atmospheric particle collection near PolyJohn company.

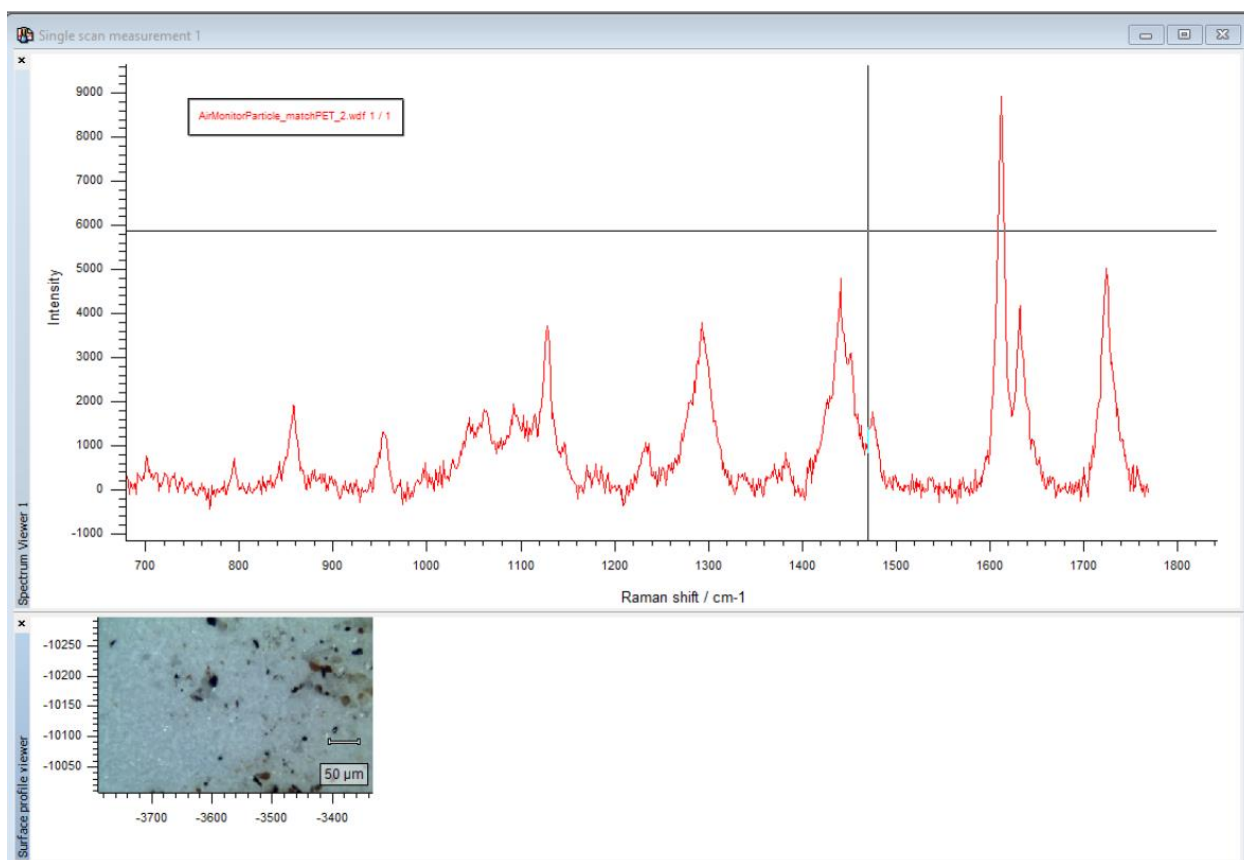

**Figure S5.** Raman spectrum of air monitor particles on surface of filter. The spectrum matched the library for polyethylene terephthalate, PET.
